# Supplementary figures and images for: Fabrication of novel strain sensors from green TPV nanocomposites based on poly(3-hydroxybutyrate-co-3-hydroxyvalerate) (PHBV)/silicone rubber/silicon-modified graphene oxide
Source: Royal Society of Chemistry journal article supplement (doi:10.1039/d3ra02940a), 2023-01-01

Supporting Information

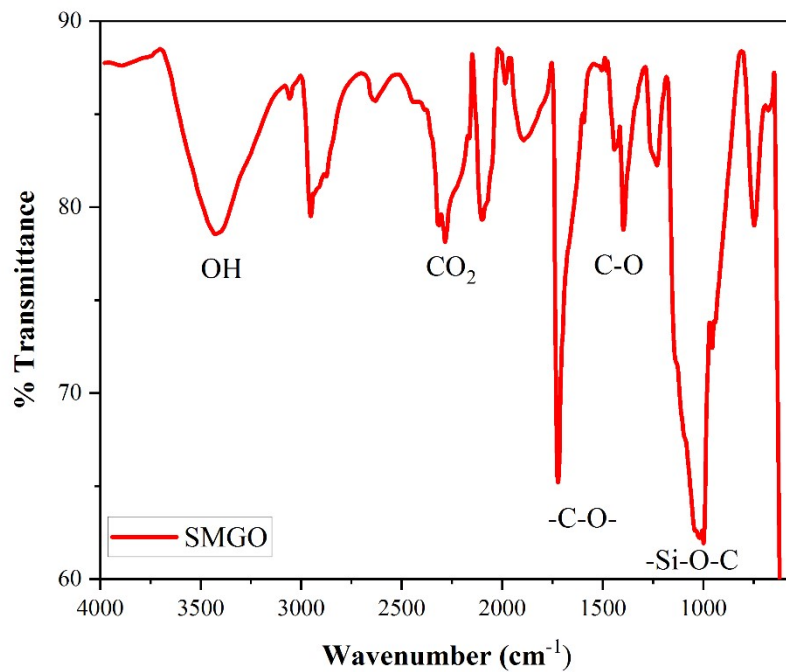

**Fig. S1.** FTIR spectra of of Silicone-Modified Graphene Oxide (SMGO).

Supplement: d3ra02940a1.pdf [file d3ra02940a1.pdf]
